# Supplementary material for: A Longitudinal Study of BDNF Promoter Methylation and Depression in Breast Cancer
Source: PubMed Central journal article supplement — Psychiatry Investig. 2015 Sep 30;12(4):523–31. doi: 10.4306/pi.2015.12.4.523 (PMC4620310; doi:10.4306/pi.2015.12.4.523), 2015-09-30
Supplement: pi-12-523-s002.pdf [file pi-12-523-s002.pdf]

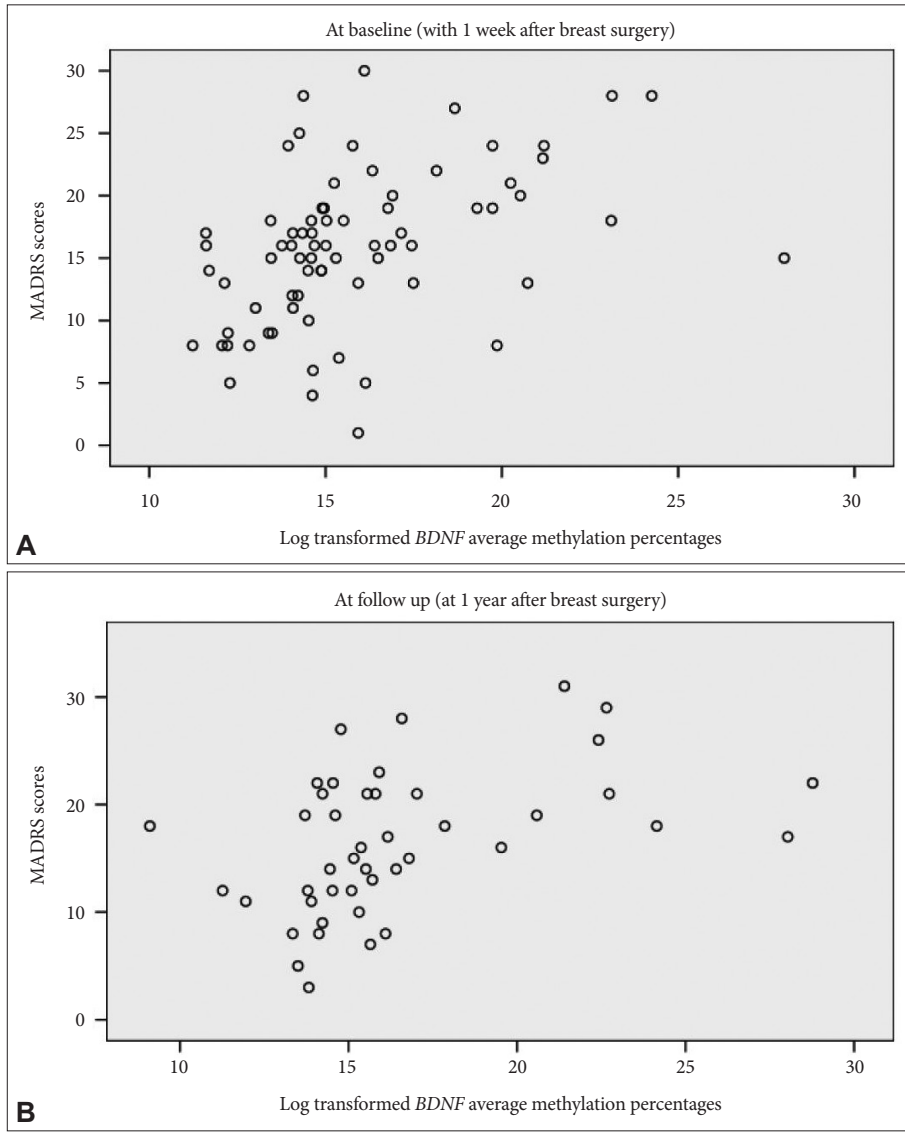

**Supplementary Figure 2.** Scatter plots for the associations between average brain-derived neurotrophic factor (BDNF) methylation percentage and Montgomery-Asberg Depression Rating Scale (MADRS) scores at baseline (A) and at follow-up (B).
