# Supplementary material for: A Longitudinal Study of BDNF Promoter Methylation and Depression in Breast Cancer
Source: PubMed Central journal article supplement — Psychiatry Investig. 2015 Sep 30;12(4):523–31. doi: 10.4306/pi.2015.12.4.523 (PMC4620310; doi:10.4306/pi.2015.12.4.523), 2015-09-30
Supplement: pi-12-523-s003.pdf [file pi-12-523-s003.pdf]

**Supplementary Table 1.** Sociodemographic and clinical characteristics by depression

|                                              | Within 1 week (N=309) |                   |                          |          | At 1 year (N=244)     |                   |                          |          |
|----------------------------------------------|-----------------------|-------------------|--------------------------|----------|-----------------------|-------------------|--------------------------|----------|
|                                              | No depression (N=235) | Depression (N=74) | Statistical coefficients | p-value* | No depression (N=200) | Depression (N=44) | Statistical coefficients | p-value* |
| Age, mean (SD) years                         | 50.6 (10.0)           | 51.5 (8.7)        | t=-0.683                 | 0.495    | 50.0 (10.0)           | 52.1 (7.8)        | t=-1.333                 | 0.184    |
| Education, mean (SD) year                    | 10.5 (3.9)            | 10.2 (3.9)        | t=0.541                  | 0.589    | 10.7 (3.9)            | 10.0 (3.3)        | t=1.173                  | 0.242    |
| Current occupation, N (%) have               | 68 (28.9)             | 21 (28.4)         | $\chi^2=0.009$           | 0.926    | 56 (28.0)             | 18 (40.9)         | $\chi^2=2.844$           | 0.092    |
| Marital status, N (%) married                | 190 (80.9)            | 60 (81.1)         | $\chi^2=0.002$           | 0.965    | 165 (82.5)            | 36 (81.8)         | $\chi^2=0.012$           | 0.914    |
| Religious affiliation, N (%) yes             | 183 (77.9)            | 57 (77.0)         | $\chi^2=0.023$           | 0.879    | 150 (75.0)            | 36 (81.8)         | $\chi^2=0.925$           | 0.336    |
| Living alone, N (%) yes                      | 17 (7.2)              | 8 (10.8)          | $\chi^2=0.968$           | 0.325    | 13 (6.5)              | 3 (6.8)           | $\chi^2=0.006$           | 0.938    |
| Personal history of depression, N (%) yes    | 14 (6.0)              | 10 (13.5)         | $\chi^2=4.485$           | 0.034    | 12 (6.0)              | 6 (13.6)          | $\chi^2=3.078$           | 0.106    |
| Family history of depression, N (%) yes      | 1 (0.4)               | 3 (4.1)           | $\chi^2=5.799$           | 0.044    | 1 (0.5)               | 2 (4.5)           | $\chi^2=4.860$           | 0.085    |
| Chronic physical disorders, mean (SD) number | 0.4 (0.8)             | 0.3 (0.6)         | t=0.788                  | 0.431    | 0.3 (0.7)             | 0.4 (0.9)         | t=-0.747                 | 0.456    |
| Body mass index, mean (SD) kg/m <sup>2</sup> | 24.1 (3.5)            | 23.9 (3.1)        | t=0.591                  | 0.555    | 24.1 (3.5)            | 24.4 (2.8)        | t=-0.508                 | 0.612    |
| Estrogen receptor, N (%) positive            | 129 (54.9)            | 44 (59.5)         | $\chi^2=0.476$           | 0.490    | 111 (55.5)            | 25 (56.8)         | $\chi^2=0.025$           | 0.873    |
| Progesterone receptor, N (%) positive        | 130 (55.3)            | 43 (58.1)         | $\chi^2=0.178$           | 0.673    | 115 (57.5)            | 25 (56.8)         | $\chi^2=0.007$           | 0.934    |
| Tumor size, mean (SD) mm                     | 18.3 (11.7)           | 19.2 (12.4)       | t=-0.545                 | 0.586    | 18.1 (10.4)           | 20.6 (14.6)       | t=-1.316                 | 0.189    |
| Axillary lymph node, N (%) present           | 71 (30.2)             | 24 (32.4)         | $\chi^2=0.130$           | 0.718    | 61 (30.5)             | 18 (40.9)         | $\chi^2=1.785$           | 0.182    |
| Time since cancer diagnosis, mean (SD) month | 2.4 (6.5)             | 2.8 (10.5)        | t=-0.435                 | 0.664    | 2.3 (8.4)             | 2.8 (7.3)         | t=-0.319                 | 0.750    |
| Chemotherapy, N (%) done                     | 171 (72.8)            | 49 (66.2)         | $\chi^2=1.177$           | 0.278    | 142 (71.0)            | 33 (75.0)         | $\chi^2=0.285$           | 0.594    |
| Surgery type, N (%)                          |                       |                   | $\chi^2=0.769$           | 0.381    |                       |                   | $\chi^2=0.390$           | 0.532    |
| Breast conserving                            | 156 (66.4)            | 45 (60.8)         |                          |          | 137 (68.5)            | 28 (63.3)         |                          |          |
| Mastectomy                                   | 79 (33.6)             | 29 (39.2)         |                          |          | 63 (31.5)             | 16 (36.4)         |                          |          |
| Relapsed cancer, N (%) yes                   | 13 (5.5)              | 3 (4.1)           | $\chi^2=0.250$           | 0.770    | 12 (6.0)              | 2 (4.5)           | $\chi^2=0.141$           | 1.000    |
| Cancer stage, N (%)                          |                       |                   | $\chi^2=1.002$           | 0.317    |                       |                   | $\chi^2=2.137$           | 0.144    |
| 0                                            | 20 (8.5)              | 9 (12.2)          | (linear)                 |          | 17 (8.5)              | 3 (6.8)           | (linear)                 |          |
| I                                            | 79 (33.6)             | 26 (35.1)         |                          |          | 74 (37.0)             | 12 (27.3)         |                          |          |
| II                                           | 95 (40.4)             | 27 (36.5)         |                          |          | 79 (39.5)             | 19 (43.2)         |                          |          |
| III                                          | 32 (13.6)             | 11 (14.9)         |                          |          | 24 (12.0)             | 8 (18.2)          |                          |          |
| IV                                           | 9 (3.8)               | 1 (1.4)           |                          |          | 6 (3.0)               | 2 (4.5)           |                          |          |
| <i>BDNF</i> val66met                         |                       |                   | $\chi^2=6.661$           | 0.010    |                       |                   | $\chi^2=7.353$           | 0.007    |
| Val/val                                      | 58 (24.7)             | 13 (17.6)         | (linear)                 |          | 49 (24.5)             | 8 (18.2)          | (linear)                 |          |
| Val/met                                      | 135 (57.4)            | 36 (48.6)         |                          |          | 117 (58.5)            | 18 (40.9)         |                          |          |
| Met/met                                      | 42 (17.9)             | 25 (33.8)         |                          |          | 34 (17.0)             | 18 (40.9)         |                          |          |

\*p-values using t-tests or  $\chi^2$  tests as appropriate. BDNF: brain-derived neurotrophic factor
