# Supplementary material for: A Longitudinal Study of BDNF Promoter Methylation and Depression in Breast Cancer
Source: PubMed Central journal article supplement — Psychiatry Investig. 2015 Sep 30;12(4):523–31. doi: 10.4306/pi.2015.12.4.523 (PMC4620310; doi:10.4306/pi.2015.12.4.523), 2015-09-30
Supplement: pi-12-523-s004.pdf [file pi-12-523-s004.pdf]

**Supplementary Table 2.** *BDNF* promoter methylation percentages by val66met polymorphism

| Methylation site | Mean (SD) methylation percentage by val66met polymorphism |                 |                | F-value* | p-value* |
|------------------|-----------------------------------------------------------|-----------------|----------------|----------|----------|
|                  | val/val (N=71)                                            | val/met (N=171) | met/met (N=67) |          |          |
| CpG 1            | 13.3 (1.9)                                                | 13.4 (1.9)      | 13.1 (1.6)     | 0.799    | 0.451    |
| CpG 3            | 72.6 (3.4)                                                | 73.8 (4.1)      | 73.3 (3.4)     | 2.422    | 0.090    |
| CpG 5            | 33.9 (7.1)                                                | 33.7 (5.1)      | 34.1 (7.9)     | 0.090    | 0.914    |
| CpG 7            | 51.1 (10.3)                                               | 49.3 (11.3)     | 50.7 (10.0)    | 0.820    | 0.441    |
| CpG 8            | 21.2 (19.9)                                               | 24.4 (22.1)     | 22.8 (18.2)    | 0.648    | 0.524    |
| CpG 9            | 21.8 (24.7)                                               | 22.7 (23.1)     | 26.4 (26.1)    | 0.750    | 0.473    |
| CpG average      | 35.6 (6.9)                                                | 36.2 (6.2)      | 36.7 (6.5)     | 0.501    | 0.607    |

\*p-value derived from ANOVA. BDNF: brain-derived neurotrophic factor, ANOVA: analysis of variance, CpG: cytosines in cytosine-guanine
