# Supplementary material for: A Longitudinal Study of BDNF Promoter Methylation and Depression in Breast Cancer
Source: PubMed Central journal article supplement — Psychiatry Investig. 2015 Sep 30;12(4):523–31. doi: 10.4306/pi.2015.12.4.523 (PMC4620310; doi:10.4306/pi.2015.12.4.523), 2015-09-30
Supplement: pi-12-523-s005.pdf [file pi-12-523-s005.pdf]

**Supplementary Table 3.** Multi-variate analyses of examining the interactive effects of *BDNF* methylation percentages (CpGs) and val-66met polymorphism (P) on depression

|               | Within 1 week (N=309) |                   | At 1 year (N=244) |                  |
|---------------|-----------------------|-------------------|-------------------|------------------|
|               | Wald                  | OR (95% CI)       | Wald              | OR (95% CI)      |
| CpG1×P        | 0.113                 | 1.04 (0.82–1.32)  | 0.000             | 1.00 (0.75–1.33) |
| CpG3×P        | 3.590                 | 0.88 (0.77–1.00)  | 0.230             | 0.96 (0.82–1.13) |
| CpG5×P        | 2.312                 | 0.96 (0.91–1.01)  | 0.612             | 1.03 (0.96–1.10) |
| CpG7×P        | 0.192                 | 1.01 (0.97–1.05)  | 1.510             | 1.03 (0.98–1.08) |
| CpG8×P        | 5.117                 | 0.98 (0.96–1.00)* | 0.018             | 1.00 (0.97–1.02) |
| CpG9×P        | 2.466                 | 0.99 (0.97–1.08)  | 1.792             | 0.99 (0.97–1.01) |
| CpG average×P | 4.979                 | 0.93 (0.88–0.99)* | 0.125             | 0.99 (0.92–1.06) |

All analyses are adjusted for personal and family history of depression. All results failed to show statistical significance after Bonferroni correction. \*p-value<0.05. BDNF: brain-derived neurotrophic factor, CpG: cytosines in cytosine-guanine
