# Supplementary figures and images for: A Longitudinal Study of BDNF Promoter Methylation and Depression in Breast Cancer
Source: PubMed Central journal article supplement — Psychiatry Investig. 2015 Sep 30;12(4):523–31. doi: 10.4306/pi.2015.12.4.523 (PMC4620310; doi:10.4306/pi.2015.12.4.523), 2015-09-30

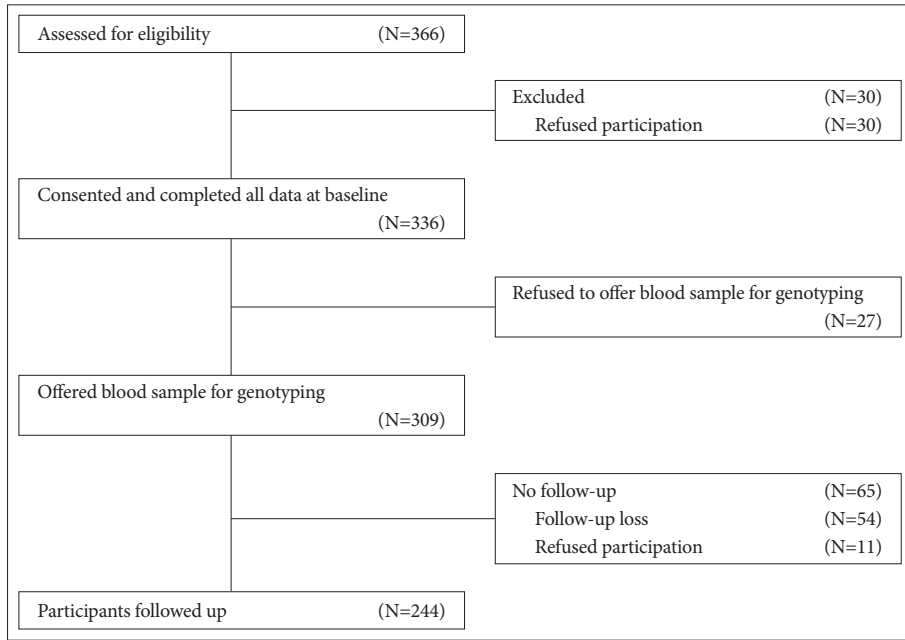

**Supplementary Figure 1.** Flow diagram for baseline recruitment and follow-up.

Supplement: pi-12-523-s001.pdf [file pi-12-523-s001.pdf]
